# Supplementary material for: Differential response of rat strains to obesogenic diets underlines the importance of genetic makeup of an individual towards obesity
Source: PubMed Central journal article supplement (PMC5567335; doi:10.1038/s41598-017-09149-6), 2017-08-22
Supplement: 41598_2017_9149_MOESM1_ESM.pdf [file 41598_2017_9149_MOESM1_ESM.pdf]

**Differential response of rat strains to obesogenic diets underlines the importance of genetic makeup of an individual towards obesity.**

Naga Muralidhar M, SMVK Prasad, Kiran Kumar Battula, Giridharan N V and Rajender Rao Kalashikam\*

National Centre for Laboratory Animal Sciences, National Institute of Nutrition, Hyderabad-500007, Telangana, India

\*Corresponding author

e-mail: [rkrajender@yahoo.com](mailto:rkrajender@yahoo.com)

**Supplementary Table S1. Control and high calorie diet composition and energy levels.**

| <b>Ingredient (g/100g)</b> | <b>Control (C)</b> | <b>High Fat (HF)</b> | <b>High Sucrose (HS)</b> | <b>High fat sucrose (HFS)</b> |
|----------------------------|--------------------|----------------------|--------------------------|-------------------------------|
| Corn Starch                | 63                 | 27                   | ---                      | 42                            |
| Sucrose                    | ---                | ---                  | 63                       | ---                           |
| Casein                     | 20                 | 27                   | 20                       | 24                            |
| Soybean Oil                | 7                  | ---                  | 7                        | ---                           |
| Lard                       | ---                | 36                   | ---                      | 24                            |
| Cellulose                  | 5                  | 5                    | 5                        | 5                             |
| Mineral Mixture (93G)      | 3.5                | 3.5                  | 3.5                      | 3.5                           |
| Vitamin Mixture (93G)      | 1.0                | 1.0                  | 1.0                      | 1.0                           |
| L- Cysteine                | 0.3                | 0.3                  | 0.3                      | 0.3                           |
| Choline bitartrate         | 0.25               | 0.25                 | 0.25                     | 0.25                          |
| Energy (Kcal/g)            | 3.95               | 5.4                  | 3.95                     | 4.8                           |
| Carbohydrate ratio (%)     | 64                 | 20                   | 64                       | 35                            |
| Protein ratio (%)          | 20                 | 20                   | 20                       | 20                            |
| Fat ratio (%)              | 16                 | 60                   | 16                       | 45                            |

Energy levels of the diets: Control diet, 3.95Kcal/g; High fat (HF) diet, 5.4 Kcal/g; High Sucrose (HS) diet, 3.95Kcal/g; High Fat Sucrose (HFS) diet, 4.8 Kcal/g.

**Supplementary Table S2. Body composition of WNIN, F-344 and SD rats under high calorie environment.**

| Parameter               | WNIN            |                 |                 |                 | F-344           |                 |                 |                | SD              |                 |                |                 |
|-------------------------|-----------------|-----------------|-----------------|-----------------|-----------------|-----------------|-----------------|----------------|-----------------|-----------------|----------------|-----------------|
|                         | Control         | HF              | HS              | HFS             | Control         | HF              | HS              | HFS            | Control         | HF              | HS             | HFS             |
| <b>Lean body mass %</b> | 84.4 ±<br>0.556 | 85.5 ±<br>0.390 | 83.0 ±<br>0.945 | 82.8 ±<br>0.539 | 83.9 ±<br>0.407 | 82.2 ±<br>0.647 | 83.5 ±<br>0.384 | 83.3 ±<br>1.05 | 89.8 ±<br>0.508 | 88.6 ±<br>0.707 | 88.1 ±<br>1.38 | 88.2 ±<br>0.776 |
| <b>Fat free mass %</b>  | 43.5 ±<br>0.445 | 44.4 ±<br>0.312 | 42.3 ±<br>0.756 | 42.2 ±<br>0.431 | 48.7 ±<br>0.358 | 47.0 ±<br>0.790 | 48.2 ±<br>0.413 | 48.3 ±<br>1.07 | 52.3 ±<br>0.441 | 51.1 ±<br>0.714 | 51.4 ±<br>1.26 | 51.7 ±<br>0.626 |

Lean body mass and fat free mass percent (LBM% & FFM %) were assessed among WNIN, F-344 and SD under high calorie environment. Diets: control; HF, high fat; HS, high sucrose; HFS, high fat sucrose. Data was presented as mean ± SEM (n=6). Groups were compared using one way ANOVA.

**Supplementary Table S3. Individual fat pad weights of White Adipose Tissue (WAT) in WNIN, F-344 and SD under high calorie environment.**

| Parameter                      | WNIN            |                  |                 |                   | F-344           |                 |                 |                 | SD              |                 |                 |                  |
|--------------------------------|-----------------|------------------|-----------------|-------------------|-----------------|-----------------|-----------------|-----------------|-----------------|-----------------|-----------------|------------------|
|                                | Control         | HF               | HS              | HFS               | Control         | HF              | HS              | HFS             | Control         | HF              | HS              | HFS              |
| <b>Retroperitoneal fat (g)</b> | 10.9 ±<br>0.186 | 16.3 ±<br>1.75*  | 11.2 ±<br>0.548 | 21.4 ±<br>2.02*** | 7.58 ±<br>0.523 | 9.14 ±<br>0.985 | 7.52 ±<br>0.571 | 9.38 ±<br>1.58  | 3.70 ±<br>0.251 | 3.96 ±<br>0.185 | 3.56 ±<br>0.581 | 5.50 ±<br>0.650* |
| <b>Mesenteric fat (g)</b>      | 3.0 ±<br>0.225  | 4.5 ±<br>0.389** | 3.52 ±<br>0.165 | 4.88 ±<br>0.233** | 2.48 ±<br>0.289 | 2.77 ±<br>0.294 | 2.30 ±<br>0.372 | 2.85 ±<br>0.231 | 1.44 ±<br>0.172 | 1.62 ±<br>0.170 | 1.30 ±<br>0.100 | 1.94 ±<br>0.186  |
| <b>Epididymal fat (g)</b>      | 4.87 ±<br>0.233 | 7.0 ±<br>0.293*  | 6.1 ±<br>0.382  | 9.1 ±<br>0.664*** | 6.68 ±<br>0.539 | 7.96 ±<br>0.955 | 6.38 ±<br>0.441 | 7.45 ±<br>1.17  | 4.46 ±<br>0.145 | 5.25 ±<br>0.904 | 4.15 ±<br>0.629 | 5.12 ±<br>0.460  |

Measurements of white adipose tissue (WAT); retroperitoneal fat, mesenteric fat and epididymal fat. Data was presented as mean ± SEM (n=6). Diets: control; HF, high fat; HS, high sucrose; HFS, high fat sucrose. \*P<0.05; \*\*P<0.01; \*\*\*P<0.001 statistically significance compared to their respective controls. Groups were compared using one way ANOVA.

Supplementary Fig. S1. Individual fat pads weight/body weight ratio

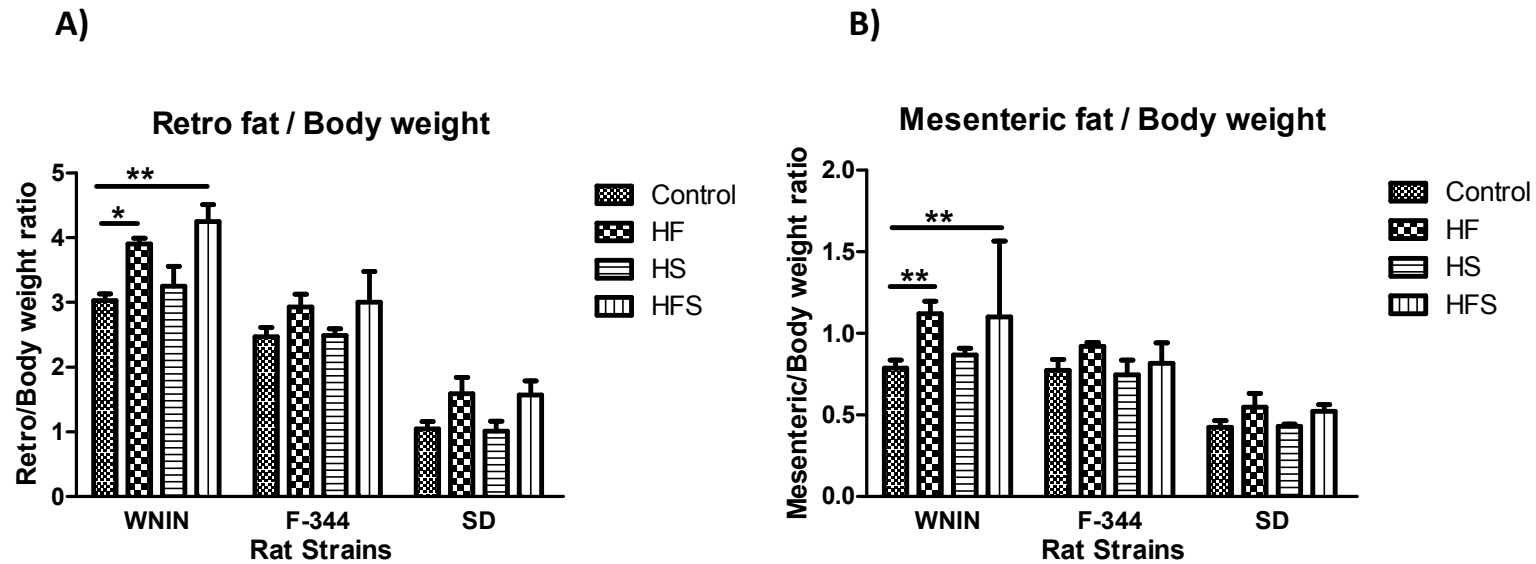

The ratios of (A) retroperitoneal fat to body weight and (B) mesenteric fat to body weight under high calorie environment. Data was presented as mean  $\pm$  SEM (n=6). Diets: control; HF, high fat; HS, high sucrose; HFS, high fat sucrose. \*P<0.05; \*\*P<0.01 statistically significance compared to their respective controls. Groups were compared using one way ANOVA.

Supplementary Fig. S2. Adiponectin to Leptin & HDL-cholesterol to Total -cholesterol ratio

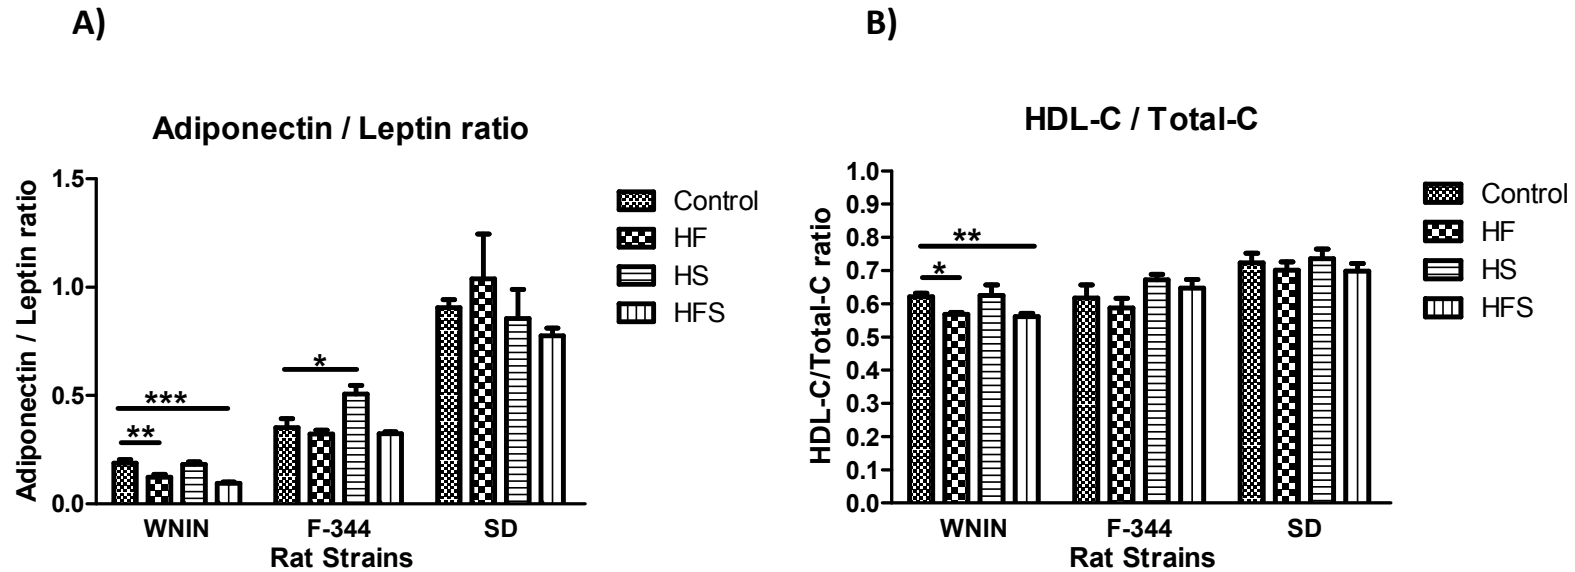

The ratios of (A) Adiponectin/Leptin and (B) HDL-cholesterol/Total-cholesterol under high calorie environment. Data was presented as mean  $\pm$  SEM (n=6). Diets: control; HF, high fat; HS, high sucrose; HFS, high fat sucrose. \*P<0.05; \*\*P<0.01; \*\*\*P<0.001 statistically significance compared to their respective controls. Groups were compared using one way ANOVA.
